# Supplementary material
Source: ML conference proceedings conference paper supplement (https://openaccess.thecvf.com/content/ICCV_2019/html/Kapishnikov_XRAI_Better_Attributions_ICCV_2019_paper.html)
Supplement: Supplementary file 1 [file Kapishnikov_XRAI_Better_Attributions_ICCV_2019_supplemental.pdf]

Archive with 3 entries (3 files):
- 6352-supp.pdf
- bus.mp4
- leopard.mp4
