# Supplementary material
Source: ML conference proceedings conference paper supplement (https://openaccess.thecvf.com/content/ICCV_2019/html/Kapishnikov_XRAI_Better_Attributions_ICCV_2019_paper.html)
Supplement: Supplementary file 1 [file Kapishnikov_XRAI_Better_Attributions_ICCV_2019_supplemental.pdf › 6352-supp.pdf]

## Supplementary Material

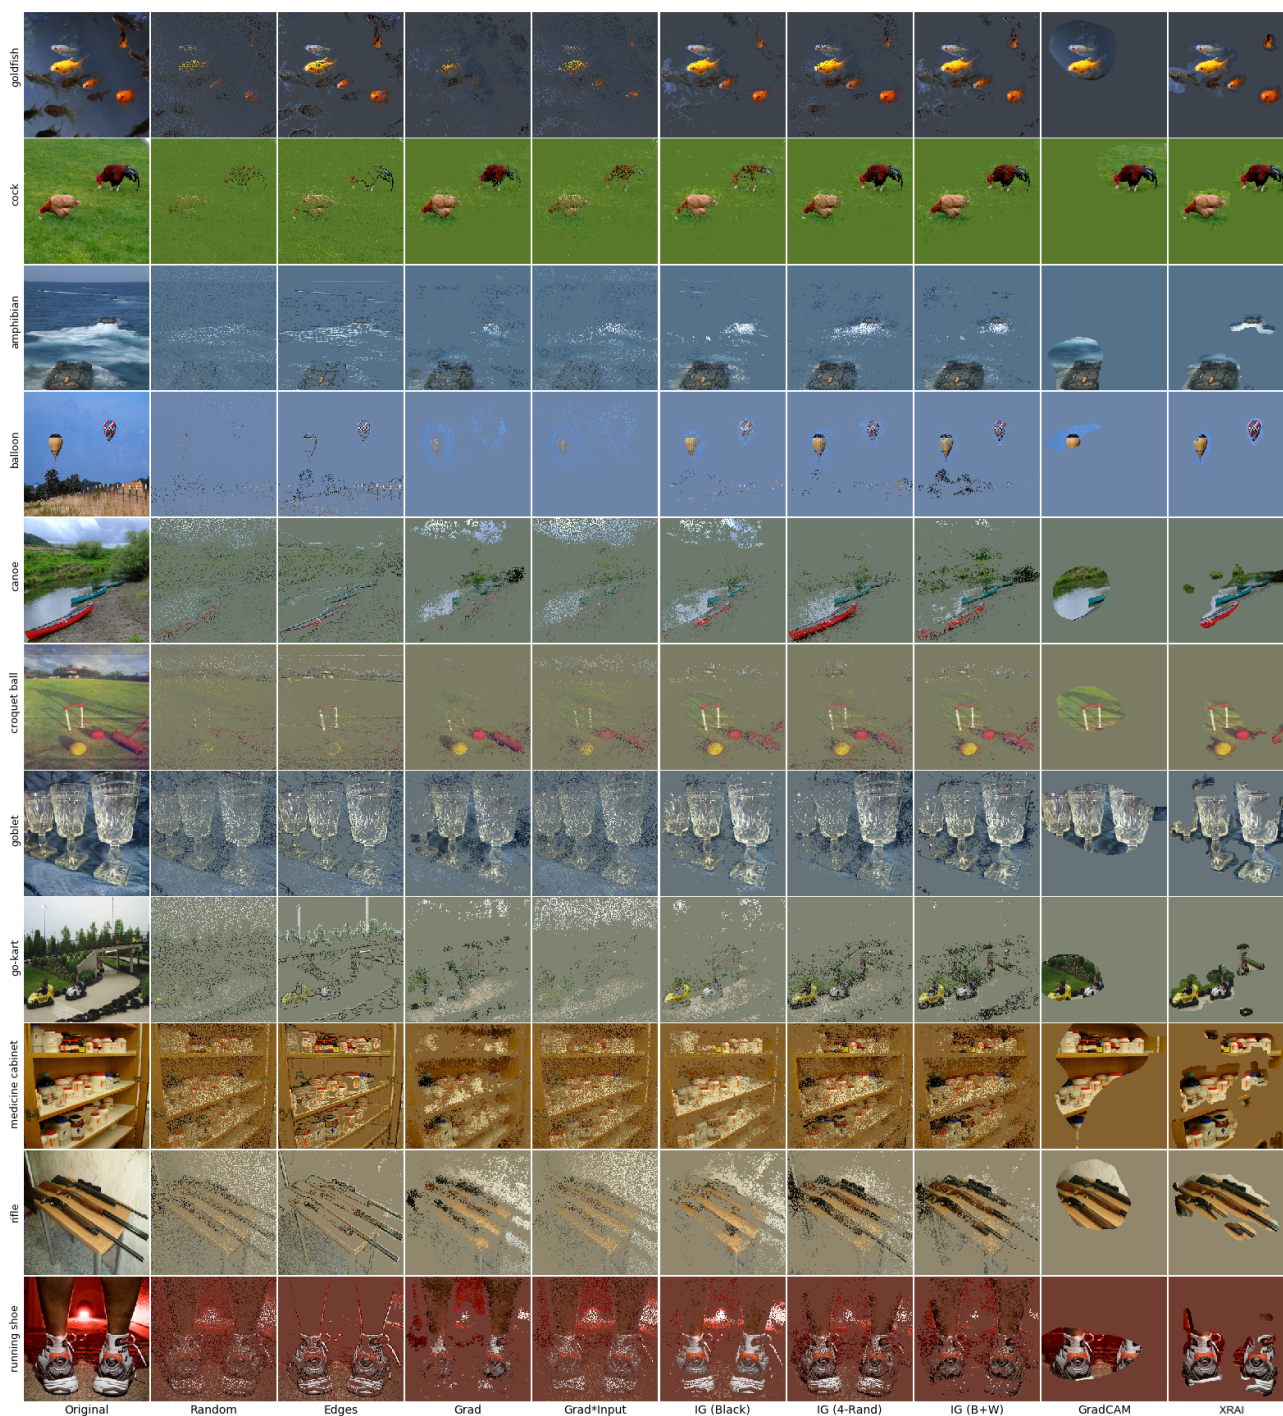

Figure 11. Additional images comparing different saliency methods (as in Figure 10).

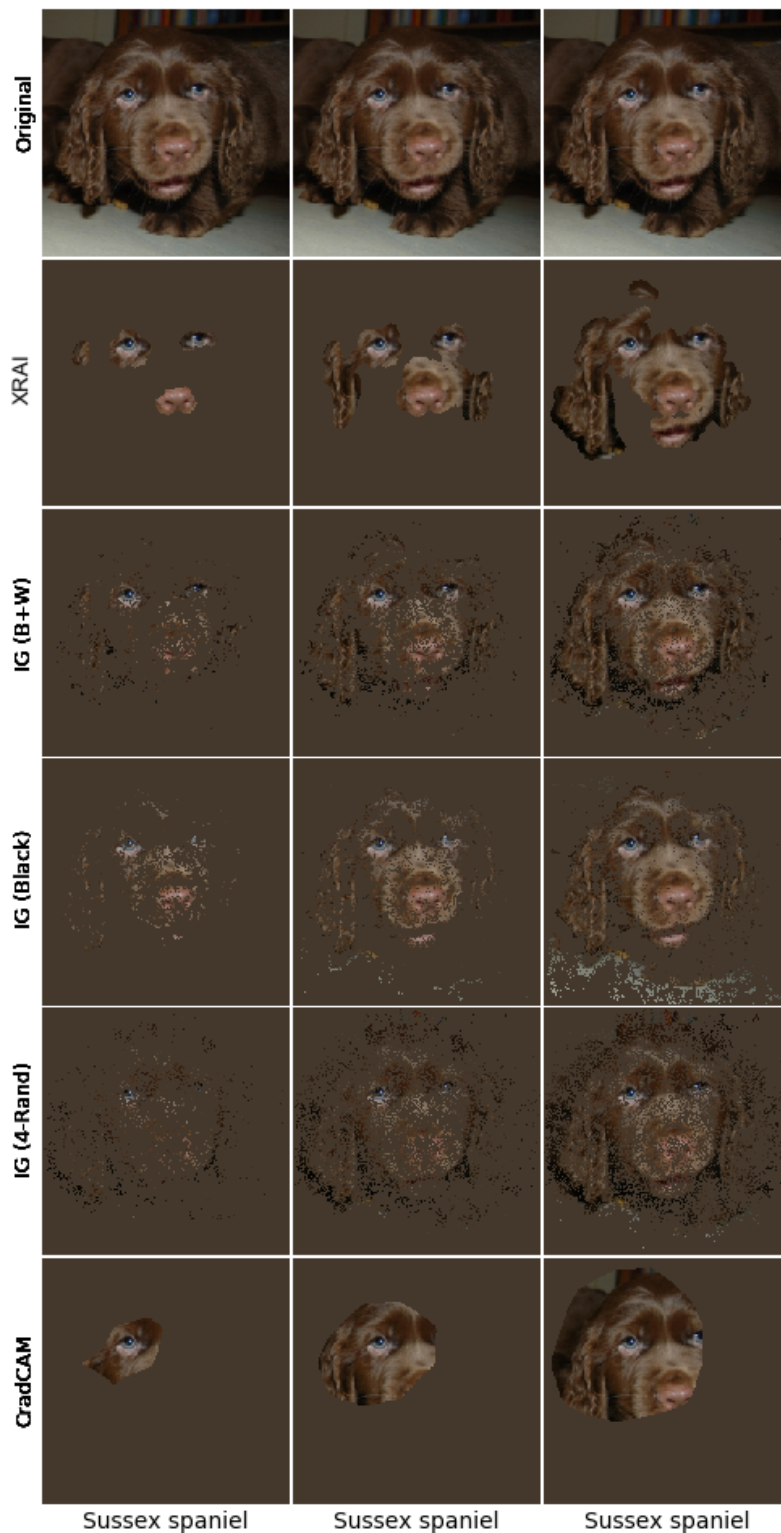

Figure 12. Comparison of methods for an image of Sussex spaniel. GradCAM tends to pick one spot and grow it (one eye of the dog) whereas XRAI can pick both eyes and the snout independently. Ears, eyes and the snout seem to be picked as the most important regions to identify the breed.
